# Supplementary material for: Purification and Characterization of Native and Vaccine Candidate Mutant Enterotoxigenic Escherichia coli Heat-Stable Toxins
Source: PubMed Central journal article supplement (PMC6071264; doi:10.3390/toxins10070274), 2018-07-03
Supplement: toxins-10-00274-s001.pdf [file toxins-10-00274-s001.pdf]

# Supplementary Materials: Purification and Characterization of Native and Vaccine Candidate Mutant Enterotoxigenic *Escherichia coli* Heat-stable Toxins

Morten L. Govasli, Yuleima Diaz, Ephrem Debebe Zegeye, Christine Darbakk, Arne M. Taxt, Pål Puntervoll

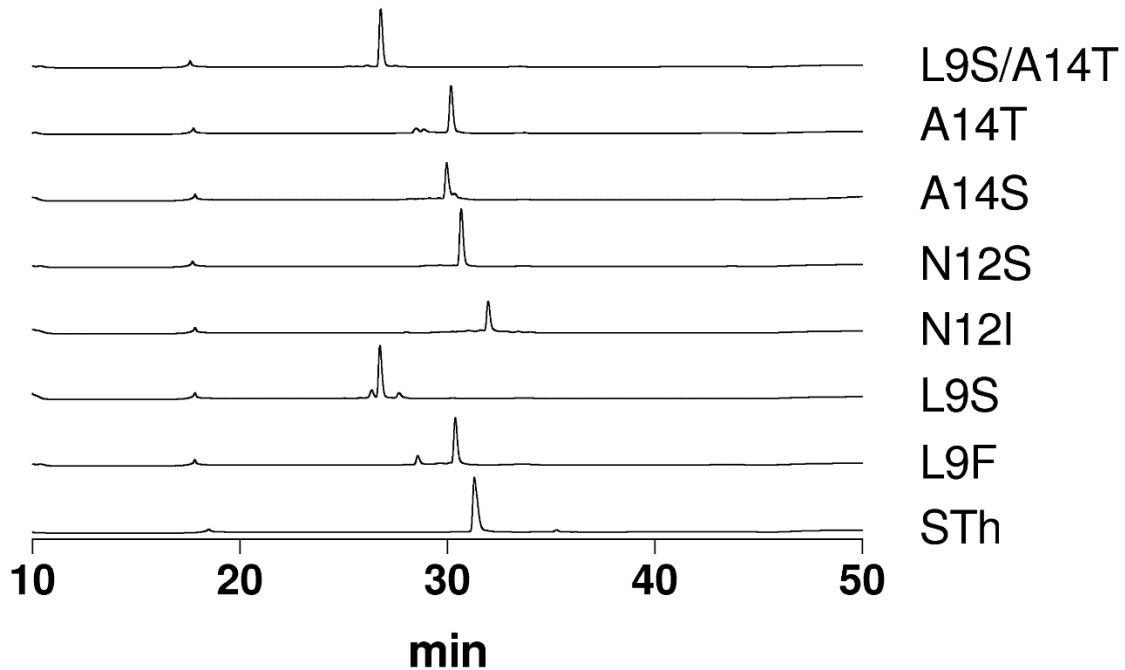

**Figure S1.** Analytical RP-HPLC elution profiles (A<sub>220</sub>) of the mutant STh peptides compared to native STh.
